# Supplementary material for: Iridium(III) bis-terpyridine complexes incorporating pendent N-methylpyridinium groups: luminescent sensors for chloride ions †
Source: Royal Society of Chemistry journal article supplement (doi:10.1039/b005046f), 2000-01-01
Supplement: b005046f.doc [file b005046f.doc]

**Paper Ref: B005046F Supplementary Information**

**Iridium(III) bis-terpyridine complexes incorporating pendent N-methyl-pyridinium groups: luminescent sensors for chloride ions**

W. Goodall and J.A.G. Williams

*Selected synthetic details and analytical data.*

*4'-(3-N-methyl pyridyl)-2,2':6',2"-terpyridine* ***L3****.* Methyl iodide (1 cm3) was added to a solution of 4'-(3-pyridyl)-2,2':6',2"-terpyridine, **L2**, (300mg, 0.97 mmol) in toluene (3 cm3) and the mixture heated in a sealed vessel at 50˚C for 24 h, during which time a yellow precipitate was formed. The mixture was filtered hot, and the yellow solid washed with hot toluene and dried under vacuum (150 mg, 34 %). 1H NMR (500 MHz, D2O): H 8.72 (1H, s, Ha), 8.55 (1H, d, 3J = 5.5, Hb), 8.31 (1H, d, 3J = 8.5, Hd), 8.13 (2H, d, 3J = 4.5, H6), 7.82 (2H, d, 3J = 7.5, H3), 7.77 (1H, dd, 3J = 8.3, 6.5, Hc), 7.70 (2H, s, H3'), 7.57 (2H, t, 3J = 7.5, H4), 7.13 (2H, dd, 3J = 7.3, 4.5, H5). m/z (ES+): 325 (M+).

*Complex* ***3*.** Ligand **L3** (262 mg, 0.81 mmol) was added to a suspension of (ttpy)IrCl3 (426 mg, 0.69 mmol) in ethylene glycol and heated at 160˚C for 3 h. Addition of the resulting red solution to saturated aqueous KPF6 gave a deep red precipitate, which was purified by column chromatography on silica {gradient elution from CH3CN to 70% CH3CN / 27.5% H2O / 2.5% KNO3 (aq., saturated)}. Ion-exchange with saturated KPF6 solution as above gave the required complex as a yellow solid (41 mg, 5 %). 1H NMR (400 MHz, CD3CN, t and q refer to the tolyl-terpyridine and quaterpyridine ligands respectively): H 9.36 (1H, s, Ha), 9.16 (1H, d, 3J = 8.4, Hb), 9.11 and 9.06 (each 2H, s, H3'q and H3't), 8.94 (1H, d, 3J = 6.0, Hd), 8.71 and 8.66 (each 2H, d, 3J = 8.4, H3q and H3t), 8.42 (1H, dd, 3J = 8.1, 6.4, Hc), 8.27 and 8.23 (each 2H, td, 3J = 8.0, H4q and H4t), 8.13 (2H, d, 3J = 8.0, Ho), 7.73 and 7.68 (each 2H, d, 3J = 5.6, H6q and H6t), 7.63 (2H, d, 3J = 8.0, Hm), 7.54 and 7.50 (each 2H, td, 3J = 5.6, 1.2, H5q and H5t), 4.57 (3H, s, NCH3), 2.57 (3H, s, CCH3). m/z (ES+): 420 [M4++2e-]2+, 280 [M4++e-]+, 210 M4+.

**Figure 3** Stern-Volmer plots of the dependence of the short-lived (filled circles) and long-lived (open circles) components of the emission of complex **3** on chloride ion concentration (em 510 nm; ex 355 nm).

The data in figure 2 were fitted to a modified Stern-Volmer equation (in which it is assumed that a fraction of the emitting species are not quenched at all), leading to a Ksv value of 42 M-1 and a quenchable fraction of 0.78. A more appropriate treatment allows for the weaker quenching of the second species.¥ Data was fitted to an equation of the form:

where *f1* and *f2* are the fractional contributions of the two species to the total emission at wavelength  and K1 and K2 are the Stern-Volmer quenching constants at this wavelength. In figure 4, the points are the experimental data from figure 2 and the solid line represents the fit to this equation with calculated parameters *f1* = 0.76, *f2* = 0.24, K1 = 43 M-1, K2 = 0.99 M-1. The larger quenching constant is in good agreement with the value from the lifetime data in figure 3, although the second value is much smaller than that based on the change in the lifetime of the longer-lived component and the fractional contributions are not in line with the data from the time-resolved studies. This treatment assumes that the two emitting species are acting independently, which is not the case in this system.

**Figure 4**

¥ See, for example, "Principles of Fluorescence Spectroscopy", J.R. Lakowicz, 2nd ed, Kluwer Academic: New York, 1999. Chapter 8.
